# Supplementary material for: Modulations in the self-assembly of bovine serum albumin by enhanced depolymerisation and condensation induced upon stirring
Source: Royal Society of Chemistry journal article supplement (doi:10.1039/c6ra20243h), 2016-01-01
Supplement: c6ra20243h1.pdf [file c6ra20243h1.pdf]

## **Electronic Supporting Information**

# **Modulations in the self-assembly of bovine serum albumin by enhanced depolymerisation and condensation induced upon stirring**

*Shivnetra Saha, Rupali Shekhawat, Shashank Deep\**

### **AUTHOR INFORMATION**

#### **Corresponding Author**

\*Shashank Deep

Associate Professor,

Department of Chemistry, Indian Institute of Technology, Delhi, Hauz-Khas, New Delhi

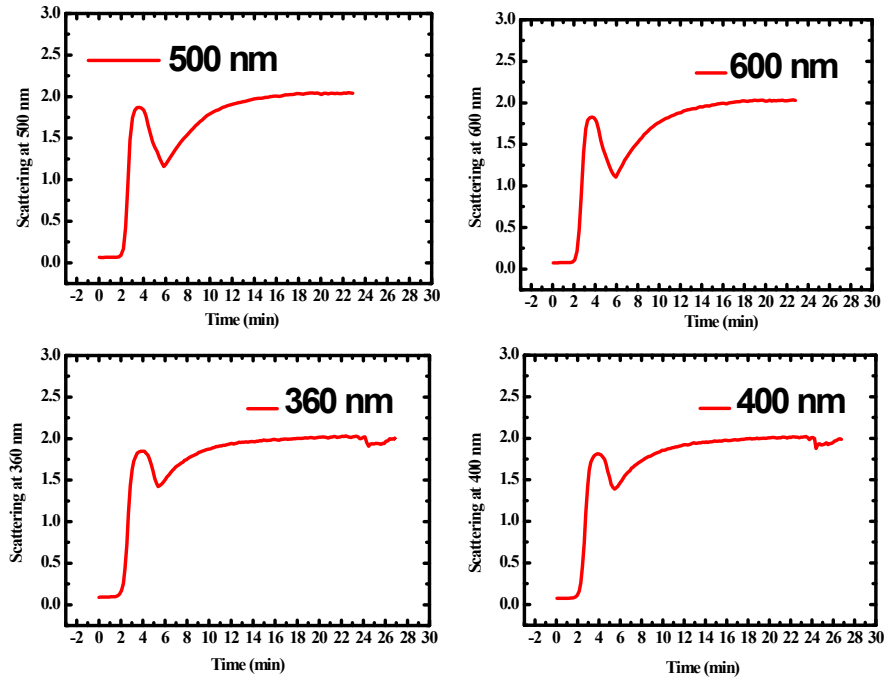

Fig. 1 Aggregation of the BSA-CTAB system (321 K) monitored at 4 different wavelengths

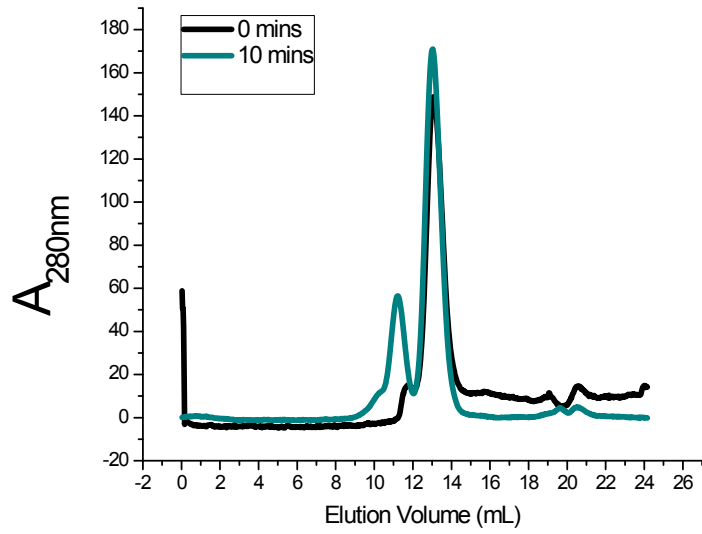

**Fig. 2** Size exclusion profile of the supernatant left at the end of unstirred aggregation at 333 K (Black trace, 0 minutes) and after 10 minutes of stirring the same solution (dark cyan)

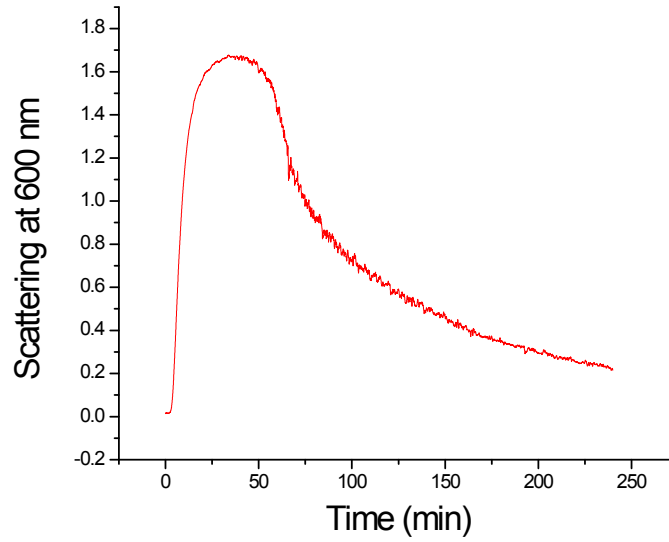

**Fig. 3** Aggregation of the BSA CTAB system at 321 K monitored over a long time under unstirred conditions. The decrease in signal indicates the formation of larger aggregates which settle down with time

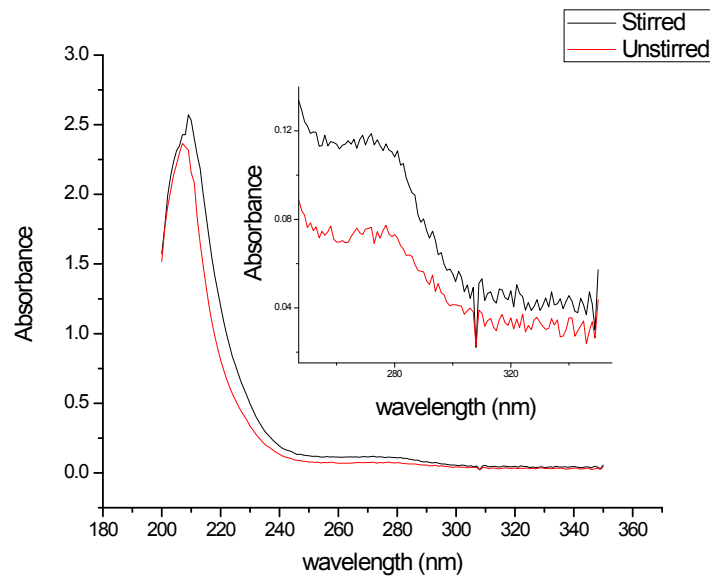

**Fig. 4 Absorbance spectra of the supernatant of the aggregation of the BSA-CTAB system at 321 K after 16 hours**

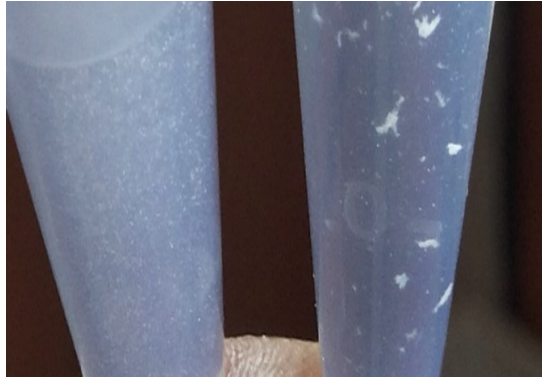

**Fig. 5. Clumping of smaller aggregates into bigger aggregates in the first phase**
